# Supplementary material for: Associations Between Interindividual Differences, Expectations and Placebo and Nocebo Effects in Itch
Source: Front Psychol. 2021 Dec 13;12:781521. doi: 10.3389/fpsyg.2021.781521 (PMC8711701; doi:10.3389/fpsyg.2021.781521)
Supplement: Supplementary file 3 [file Data_Sheet_3.XLSX]

## Sheet: Sheet1
Supplementary Table 4. A summary of the conditional process analyses for study 1: the contribution of interindividual differences as moderators to the effects of verbal suggestions on mean itch, as mediated by itch expectations
			Moderator in model
			Sex		Neuroticism		Extraversion		Optimism		Distress		Perceived stress		Worrying		BAS drive		BAS fun seeking		BAS reward responsiveness		Behavioral inhibition
Model (summary)	Variable	Path	B (SE)	95% CI	Coeff (SE)	95% CI	Coeff (SE)	95% CI	Coeff (SE)	95% CI	Coeff (SE)	95% CI	Coeff (SE)	95% CI	Coeff (SE)	95% CI	Coeff (SE)	95% CI	Coeff (SE)	95% CI	Coeff (SE)	95% CI	Coeff (SE)	95% CI
Level 1. Effects on post-VSs itch expectation (M)	Group (X)	a1	-2.85 (1.40) *		-2.86 (0.44)***		-1.11 (1.01)		-0.75 (1.52)		-2.72 (0.55)***		-2.03 (0.72)**		-2.74 (1.09)*		-3.59 (1.44)*		-2.74 (1.65)		-3.13 (2.68)		-1.44 (1.50)
	Moderator (W)	a2	0.29 (0.57)		0.11 (0.09)		0.06 (0.08)		-0.02 (0.06)		0.06 (0.05)		0.07 (0.04)		0.02 (0.02)		0.04 (0.09)		0.01 (0.11)		-0.06 (0.10)		0.07 (0.05)
	Interaction (XW)	a3	0.03 (0.75)		0.01 (0.11)		-0.19 (0.11) †		-0.14 (0.09)		-0.02 (0.07)		-0.07 (0.05)		-0.001 (0.02)		0.07 (0.12)		-0.01 (0.15)		0.02 (0.15)		-0.07 (0.07)
	Pre-VSs itch expectation [Cov1]	e1	0.76 (0.08)***		0.75 (0.08)***		0.76 (0.08) ***		0.74 (0.08)***		0.74 (0.08)***		0.75 (0.08)***		0.74 (0.08)***		0.75 (0.08)***		0.75 (0.09)***		0.76 (0.08)***		0.76 (0.08)***
Model summary (M)	F		48.75		51.55		51.27		52.35		49.52		50.33		49.41		49.58		48.18		48.53		49.54
	p		< .001		< .001		< .001		< .001		< .001		< .001		< .001		< .001		< .001		< .001		< .001
	R2		.69		.71		.70		.71		.70		.70		.70		.70		.69		.69		.70
Conditional direct effects of X on M at moderator (W) level:	Low		.	.	.	.	-2.28 (0.41)***	-3.10; -1.45	.	.	.	.	.	.	.	.	.	.	.	.	.	.	.	.
	Medium		.	.	.	.	-3.05 (0.32)***	-3.68; -2.42	.	.	.	.	.	.	.	.	.	.	.	.	.	.	.	.
	High		.	.	.	.	-3.24 (0.38)***	-4.00; -2.49	.	.	.	.	.	.	.	.	.	.	.	.	.	.	.	.
Level 2. Effects on itch (Y)	Group (X)	c'	2.46 (2.24)		0.13 (0.68)		-0.49 (1.54)		0.39 (2.02)		0.20 (0.90)		0.05 (1.00)		0.07 (1.52)		1.43 (2.52)		3.29 (2.28)		1.31 (4.21)		-1.07 (1.98)
	Post-VSs itch expectation (M)	b1	0.79 (0.42) †		0.17 (0.15)		-0.04 (0.39)		0.53 (0.44)		0.06 (0.20)		-0.01 (0.21)		0.25 (0.35)		-0.12 (0.52)		0.15 (0.52)		-0.78 (0.86)		0.29 (0.46)
	Moderator (W)	b2	1.44 (1.52)		-0.01 (0.22)		-0.14 (0.26)		0.08 (0.19)		-0.06 (0.16)		-0.06 (0.10)		0.004 (0.05)		0.06 (0.30)		0.13 (0.30)		-0.09 (0.31)		-0.03 (0.13)
	Interaction (XW)	b3	-1.19 (1.19)		0.05 (0.15)		0.10 (0.18)		-0.01 (0.13)		0.007 (0.11)		0.02 (0.08)		0.01 (0.04)		-0.10 (0.22)		-0.28 (0.21)		-0.06 (0.24)		0.07 (0.10)
	Interaction (MW)	b4	-0.34 (0.23)		0.001 (0.03)		0.03 (0.04)		-0.03 (0.03)		0.02 (0.02)		0.01 (0.02)		-0.002 (0.01)		0.02 (0.05)		0.001 (0.05)		0.06 (0.05)		-0.01 (0.02)
Model summary (Y)	F		1.76		0.92		0.98		1.15		1.06		1.11		.90		1.89		1.42		1.97		1.09
	p		.13		.47		.43		.34		.39		.36		.48		.10		.22		.091		.37
	R2		.09		.05		.05		.06		.06		.06		.05		.10		.08		.10		.06
Conditional direct effects of X on Y at moderator (W) level:	Low		M: 1.27 (1.09)	-0.91; 3.45	0.16 (0.60)	-1.03; 1.36	0.09 (0.60)	-1.11; 1.29	0.24 (0.56)	-0.88; 1.35	0.22 (0.64)	-1.05; 1.49	0.20 (0.57)	-0.93; 1.33	0.25 (0.61)	-0.95; 1.46	0.51 (0.68)	-0.84; 1.87	0.81 (0.57)	-0.32; 1.94	0.41 (0.59)	-0.77; 1.58	0.05 (0.59)	-1.13; 1.23
	Medium		F: 0.08 (0.46)	-0.85; 1.02	0.23 (0.46)	-0.76; 1.21	0.48 (0.53)	-0.57; 1.53	0.20 (0.45)	-0.70; 1.10	0.24 (0.47)	-0.68; 1.17	0.28 (0.44)	-0.60; 1.17	0.31 (0.46)	-0.60; 1.22	0.31 (0.44)	-0.57; 1.18	0.26 (0.44)	-0.61; 1.13	0.29 (0.43)	-0.57; 1.16	0.33 (0.44)	-0.54; 1.21
	High		.	.	0.38 (0.51)	-0.64; 1.39	0.58 (0.64)	-0.70; 1.85	0.16 (0.62)	-1.07;1.40	0.28 (0.63)	-0.96; 1.52	0.46 (0.71)	-0.96; 1.87	0.40 (0.59)	-0.77; 1.57	-0.001 (0.71)	-1.41; 1.40	-0.29 (0.64)	-1.56; 0.97	0.18 (0.69)	-1.19; 1.55	0.61 (0.58)	-0.54; 1.76
Conditional indirect effects of X on Y at moderator (W) level:	Low		M: -1.28 (0.53)	-2.36; -0.37	-0.48 (0.43)	-1.35; 0.36	-0.26 (0.38)	-1.09; 0.42	-0.58 (0.37)	-1.53; -0.05	-0.30 (0.41)	-1.20; 0.43	-0.24 (0.32)	-0.92; 0.38	-0.56 (0.42)	-1.44; 0.21	-0.31 (0.45)	-1.30; 0.48	-0.45 (0.40)	-1.29; 0.33	-0.28 (0.42)	-1.18; 0.47	-0.52 (0.39)	-1.34; 0.24
	Medium		F: -0.31 (0.29)	-0.94; 0.21	-0.48 (0.34)	-1.18; 0,15	-0.66 (0.35)	-1.37; 0.04	-0.48 (0.29)	-1.13; 0.02	-0.44 (0.30)	-1.09; 0.09	-0.42 (0.28)	-1.03; 0.07	-0.52 (0.30)	-1.17; 0.04	-0.44 (0..27)	-1.03; 0.01	-0.46 (0.27)	-1.03; 0.03	-0.59 (0.27)	-1.21; -0.16	-0.52 (0.28)	-1.12; -0.003
	High		.	.	-0.49 (0.35)	-1.28; 0.08	-0.79 (0.47)	-1.70; 0.19	-0.32 (0.46)	-1.24; 0.60	-0.70 (0.36)	-1.47; -0.03	-0.89 (0.53)	-2.29; -0.15	-0.45 (0.35)	-1.28; 0.11	-0.60 (0.44)	-1.55; 0.19	-0.46 (0.38)	-1.32; 0.24	-0.89 (0.43)	-1.90; -0.22	-0.51 (0.38)	-1.44; 0.08
Pairwise contrasts between the indirect effects of x on y at levels of the moderator (Effect 1 - Effect 2)	Medium - Low		.	.	-0.003 (0.14)	-0.32; 0.28	-0.40 (0.50)	-1.35; 0.62	0.10 (0.27)	-0.28; 0.81	-0.15 (0.18)	-0.51; 0.24	-0.19 (0.17)	-0.59; 0.09	0.04 (0.19)	-0.33; 0.43	-0.13 (0.31)	-0.73; 0.49	-0.01 (0.28)	-0.57; 0.55	-0.31 (0.32)	-0.95; 0.33	0.002 (0.24)	-0.51; 0.46
	High - Low		.	.	-0.01 (0.49)	-1.07; 0.90	-0.53 (0.67)	-1.79; 0.84	0.26 (0.57)	-0.60; 1.69	-0.41 (0.51)	-1.42; 0.64	-0.65 (0.62)	-2.23; 0.30	0.11 (0.52)	-0.97; 1.11	-0.29 (0.71)	-1.68; 1.14	-0.01 (0.56)	-1.19; 1.08	-0.61 (0.64)	-1.89; 0.65	0.02 (0.52)	-1.13; 0.96
	High - Medium		.	.	-0.01 (0.35)	-0.76; 0.62	-0.13 (0.17)	-0.44; 0.22	0.16 (0.31)	-0.33; 0.90	-0.26 (0.33)	-0.92; 0.40	-0.46 (0.46)	-1.65; 0.21	0.07 (0.33)	-0.64; 0.69	-0.16 (0.41)	-0.97; 0.66	-0.01 (0.29)	-0.63; 0.54	-0.30 (0.33)	-0.98; 0.31	0.01 (0.28)	-0.64; 0.50
Index of moderated mediation			0.96	-0.14; 2.16	.	.	.	.	.	.	.	.	.	.	.	.	.	.	.	.	.	.	.	.
Note. Conditional direct effects were considered significant when demonstrated by a marginal or significant interaction effect in the OLS regression, which was further supported by significant bootstrapped conditional direct effects of X on Y at low, medium and high levels of the moderator (bootstraped at 16th, 50th and 84th percentile).
Conditional indirect effects of X on Y were considered present when demonstrated by a percentile bootstap ("conditional indirect effects of X on Y at low, medium and high levels of the moderator"), and confirmed by significant pairwise constrasts between the indirect effects at the low, medium and high levels of the moderator.
† p < .10; * p < .05; ** p < .01; *** p < .001
